# Supplementary material for: GlypNirO: An automated workflow for quantitative N - and O -linked glycoproteomic data analysis
Source: publisher site journal article supplement (doi:10.3762/bjoc.16.180), 2020-09-01
Supplement: Additional file 1 [file Supplementary Table S1 N-link Depleted_Plasma_HCC_1.raw_Byonic.xlsx]

## Sheet: Summary
Summary:

## Sheet: Spectra
Query #:z

## Sheet: Proteins
Protein Rank
