# Supplementary material for: GlypNirO: An automated workflow for quantitative N - and O -linked glycoproteomic data analysis
Source: publisher site journal article supplement (doi:10.3762/bjoc.16.180), 2020-09-01
Supplement: Additional file 1 [file Supplementary Table S42 O-linked Glycan Database.xlsx]

## Sheet: Supplementary Table S42
O-glycan Glycan Database
HexNAc(1)
HexNAc(1)Hex(1)
HexNAc(2)
HexNAc(1)Hex(1)Fuc(1)
HexNAc(2)Hex(1)
HexNAc(3)
HexNAc(1)Hex(1)NeuAc(1)
HexNAc(2)Hex(1)Fuc(1)
HexNAc(2)Hex(2)
HexNAc(3)Fuc(1)
HexNAc(3)Hex(1)
HexNAc(1)Hex(1)Fuc(1)NeuAc(1)
HexNAc(2)Hex(1)NeuAc(1)
HexNAc(2)Hex(2)Fuc(1)
HexNAc(2)Hex(3)
HexNAc(3)Hex(1)Fuc(1)
HexNAc(3)Hex(2)
HexNAc(1)Hex(1)NeuAc(2)
HexNAc(4)Hex(1)
HexNAc(2)Hex(1)Fuc(1)NeuAc(1)
HexNAc(2)Hex(2)NeuAc(1)
HexNAc(2)Hex(3)Fuc(1)
HexNAc(3)Hex(1)NeuAc(1)
HexNAc(3)Hex(2)Fuc(1)
HexNAc(3)Hex(3)
HexNAc(4)Hex(1)Fuc(1)
HexNAc(4)Hex(2)
HexNAc(2)Hex(1)NeuAc(2)
HexNAc(2)Hex(2)Fuc(1)NeuAc(1)
HexNAc(2)Hex(3)NeuAc(1)
HexNAc(3)Hex(1)Fuc(1)NeuAc(1)
HexNAc(3)Hex(2)NeuAc(1)
HexNAc(1)Hex(1)NeuAc(3)
HexNAc(3)Hex(3)Fuc(1)
HexNAc(2)Hex(2)NeuAc(2)
HexNAc(3)Hex(2)Fuc(1)NeuAc(1)
HexNAc(3)Hex(3)NeuAc(1)
HexNAc(4)Hex(3)Fuc(1)
HexNAc(2)Hex(2)Fuc(1)NeuAc(2)
HexNAc(4)Hex(4)
HexNAc(5)Hex(3)
HexNAc(3)Hex(2)NeuAc(2)
HexNAc(3)Hex(3)Fuc(1)NeuAc(1)
HexNAc(3)Hex(3)NeuAc(2)
HexNAc(3)Hex(3)Fuc(1)NeuAc(2)
HexNAc(5)Hex(5)
HexNAc(6)Hex(3)Fuc(1)
HexNAc(6)Hex(4)
HexNAc(5)Hex(3)Fuc(1)NeuAc(1)
