# Supplementary material for: GlypNirO: An automated workflow for quantitative N- and O-linked glycoproteomic data analysis
Source: PubMed Central journal article supplement (PMC7476601; doi:10.3762/bjoc.16.180), 2020-09-01
Supplement: Beilstein_J_Org_Chem-16-2127-s002.pdf [file Beilstein_J_Org_Chem-16-2127-s002.pdf]

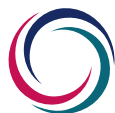

## Supporting Information

for

### **GlypNirO: An automated workflow for quantitative *N*- and *O*-linked glycoproteomic data analysis**

Toan K. Phung, Cassandra L. Pegg and Benjamin L. Schulz

*Beilstein J. Org. Chem.* **2020**, *16*, 2127–2135. [doi:10.3762/bjoc.16.180](https://doi.org/10.3762/bjoc.16.180)

### **GlypNirO workflow overview**

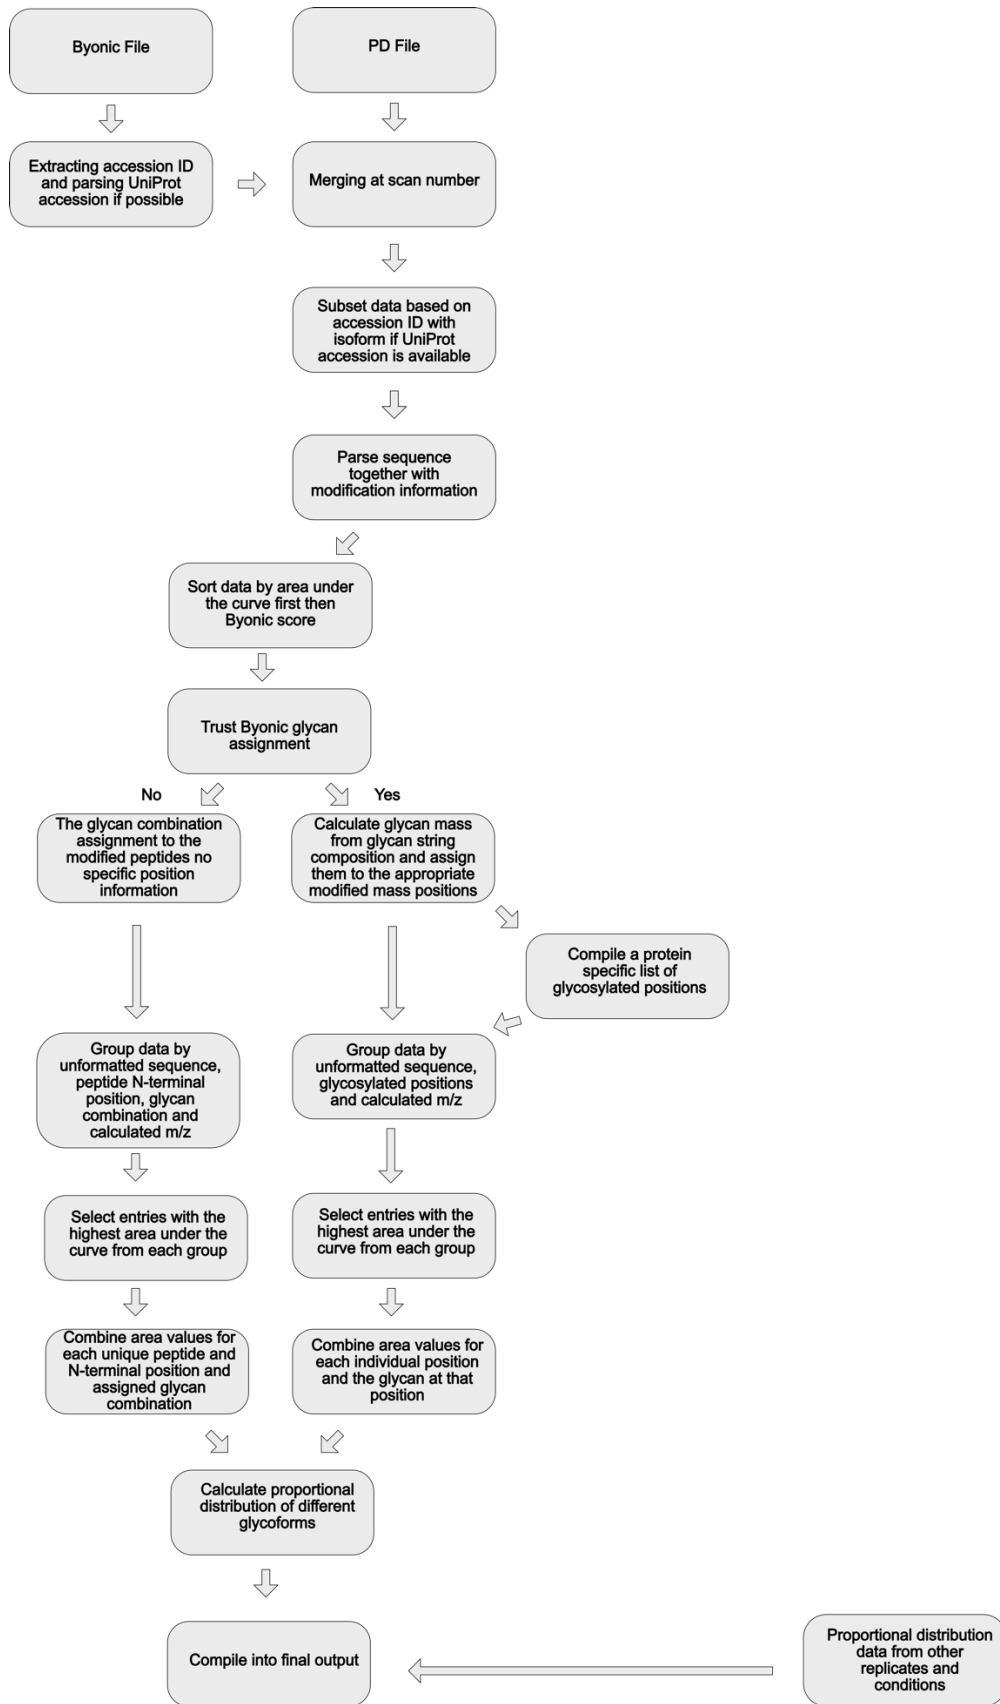

**Supplementary Figure S1: GlypNirO workflow overview.**
